# Supplementary material for: Ferrihydrite-associated organic matter (OM) stimulates reduction by Shewanella oneidensis MR-1 and a complex microbial consortia
Source: Copernicus journal article supplement (doi:10.5194/bg-14-5171-2017), 2017-11-20
Supplement: Supplementary file 1 [file bg-14-5171-2017-supplement.pdf]

Supplement of Biogeosciences, 14, 5171–5188, 2017  
<https://doi.org/10.5194/bg-14-5171-2017-supplement>  
© Author(s) 2017. This work is distributed under  
the Creative Commons Attribution 4.0 License.

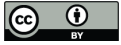

*Supplement of*

**Ferrihydrite-associated organic matter (OM) stimulates reduction by  
*Shewanella oneidensis* MR-1 and a complex microbial consortia**

**Rebecca Elizabeth Cooper et al.**

*Correspondence to:* Kirsten Küsel ([kirsten.kuesel@uni-jena.de](mailto:kirsten.kuesel@uni-jena.de))

The copyright of individual parts of the supplement might differ from the CC BY 4.0 License.

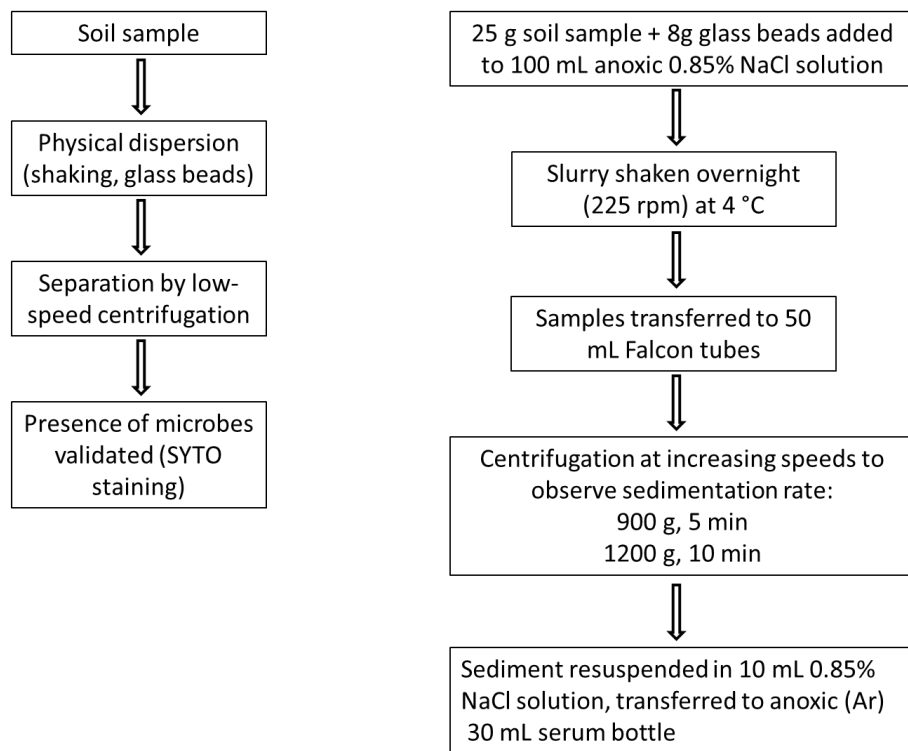

**Supplemental Figure 1.** Extraction of microbial community from peat cores. (A) Generalized flow chart for the extraction of bacteria from peat soil samples obtained from the Schlöppnerbrunnen fen (see text for details). (B) Detailed flow chart for the extraction of bacteria from peat soil samples obtained from the Schlöppnerbrunnen fen (see text for details).
